# Supplementary material for: Five-Year Cumulative Cost Saving with Thrombolysis in Korea: 3-Month Disability-Based Estimation
Source: PubMed Central journal article supplement — J Stroke. 2020 May 31;22(2):262–5. doi: 10.5853/jos.2020.00556 (PMC7341012; doi:10.5853/jos.2020.00556), 2020-05-31
Supplement: jos-2020-00556-suppl.pdf [file jos-2020-00556-suppl.pdf]

**Supplementary Table 1.** Cumulative cost per patient by year with IVT and MT compared to control

|      | Cumulative cost by year (USD) |         |         |                |         |         |
|------|-------------------------------|---------|---------|----------------|---------|---------|
|      | Control vs. IVT               |         |         | Control vs. MT |         |         |
|      | Control                       | IVT-DRG | IVT-FFS | Control        | MT-DRG  | MT-FFS  |
| Year |                               |         |         |                |         |         |
| 1    | 45,553                        | 41,806  | 42,985  | 55,847         | 53,932  | 50,681  |
| 2    | 70,127                        | 64,086  | 65,265  | 87,348         | 78,926  | 75,675  |
| 3    | 92,362                        | 84,468  | 85,647  | 115,228        | 101,989 | 98,738  |
| 4    | 112,089                       | 102,765 | 103,944 | 139,509        | 122,830 | 119,579 |
| 5    | 131,570                       | 120,638 | 121,817 | 164,149        | 143,342 | 140,091 |

IVT, intravenous thrombolysis; MT, mechanical thrombectomy; USD, US dollar; DRG, diagnostic-related group; FFS, fee-for-service.
